# Supplementary material
Source: PubMed Central journal article supplement (PMC4248999)
Supplement: AEM.01849-14_zam999105772so1.pdf [file AEM.01849-14_zam999105772so1.pdf]

## Supplemental Material

**Figure S1.** (A) Diagram showing *wblA<sub>ch</sub>* disruption via double crossover. BstPI restriction sites were shown on *wblA<sub>ch</sub>* locus. The probe for Southern blot is indicated (B) Confirmation of constructed *wblA<sub>ch</sub>* mutant by PCR amplification. (C) Southern blot analysis of wild type and  $\Delta wblA_{ch}$  mutant strains. Genomic DNA was digested with BstPI, WT strain showed a hybridized band of 587bp, and  $\Delta wblA_{ch}$  showed a band of 471bp.

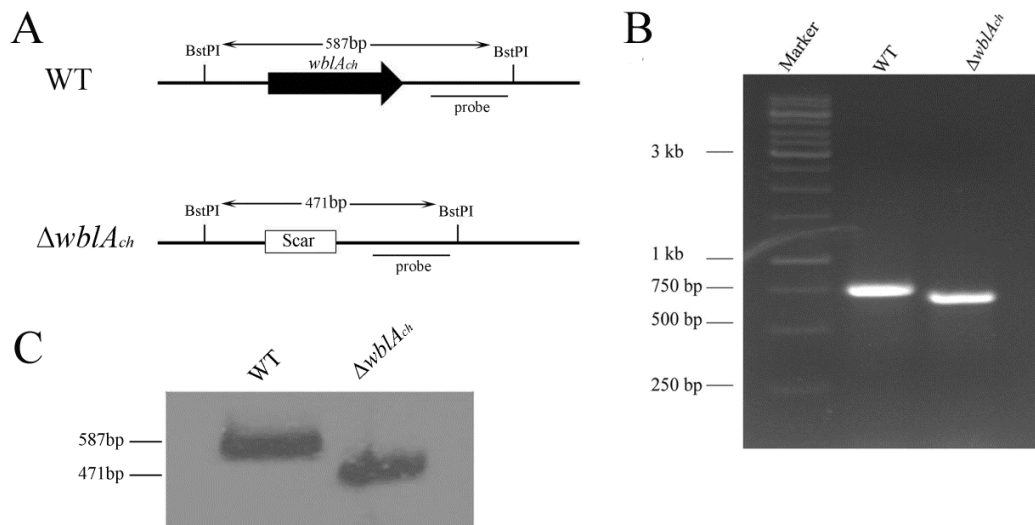

**Figure S2.** Effect of *wblA<sub>ch</sub>* disruption on morphological differentiation. (A) Growth, aerial mycelium formation, sporulation of wild-type strain (WT), *wblA<sub>ch</sub>* deletion mutant ( $\Delta wblA_{ch}$ ) and *wblA<sub>ch</sub>* complemented mutant (pYP2/*wblA<sub>ch</sub>*). (B) Scanning electron micrographs of different strains.

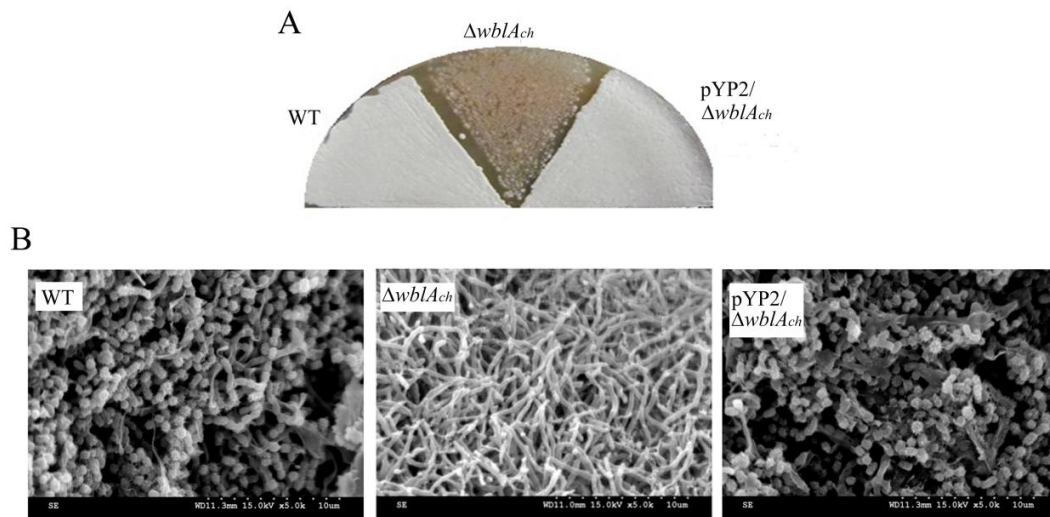

**Figure.S3.** HPLC analysis of culture filtrates from the wild-type strain (WT) (black line), and the *wblA<sub>ch</sub>*-overexpression strain (pYP3/WT) (red line). The figure on the left represents the extractions of the WT and the pYP3/WT after centrifugation. The figures on the right are the spectrogram of natamycin and yellow pigment, respectively.

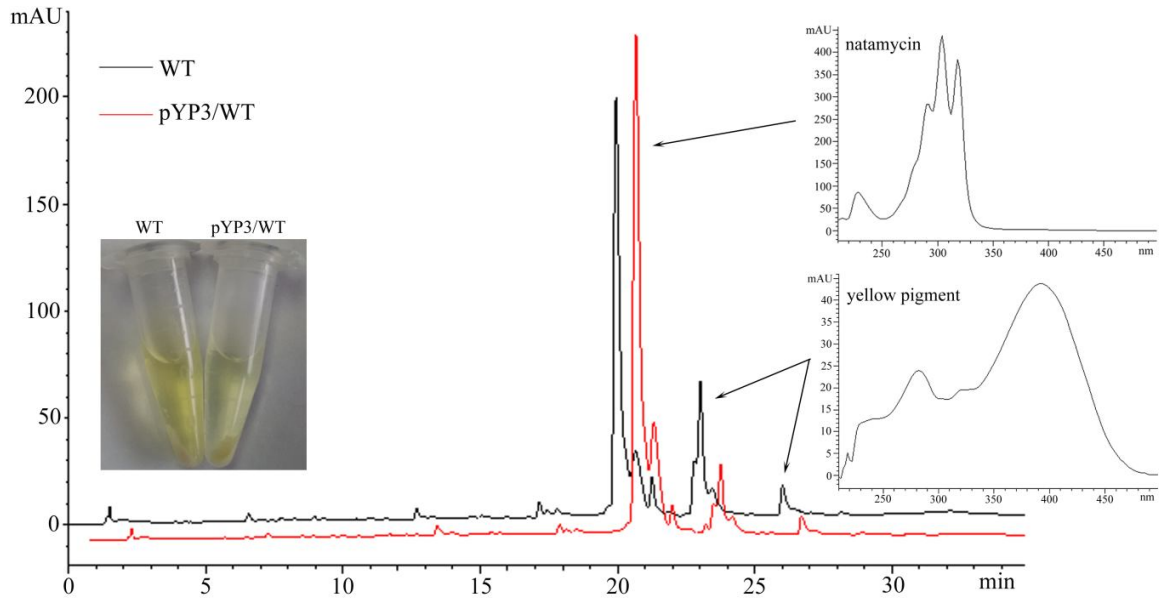

**Figure S4.** EMSA analysis of the AdpA<sub>ch</sub> binding sequences and mutated sequences. (A) Mutations generated at the AdpA<sub>ch</sub> binding sites. BamHI sites (GATATC) were used to replace the conserved AdpA<sub>ch</sub>-binding sequence in each sequence. (B) EMSA analysis. probe A, probe B and probe C covered binding site A to C, respectively. probe mA, probe mB and probe mC covered mutated site A to C, respectively. Labeled fragments were carried out with 0.1 μg and 0.2 μg of purified His<sub>6</sub>-AdpA<sub>ch</sub> protein, respectively.

**A**

Site A 5' TCTTGAATGGCCCGAACGGACTATGCG 3'      Site mutA 5' TCTTGAAGGATATCGAACGGACTATGCG 3'  
 Site B 5' ACATGGGACTTCCGGCGACACAAGCG 3'      Site mutB 5' ACATGGGACTTCCGATATCCCACAAGCG 3'  
 Site C 5' CCTCTCTGTGCGGCCCTGCC 3'      Site mutC 5' CCTCTCTGTGGATATCCTGCC 3'

**B**

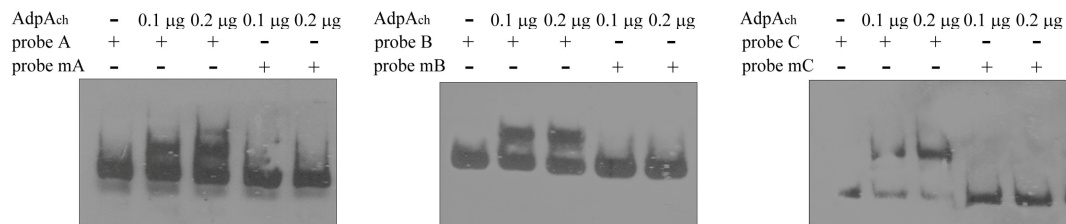

Table S1. The peak area of natamycin and yellow pigment determined by HPLC analysis from the WT strain and *wbla<sub>cht</sub>*-overexpression strain.

|                | Natamycin            |                            | Yellow pigment       |                            |
|----------------|----------------------|----------------------------|----------------------|----------------------------|
|                | Peak area<br>(mAU*s) | Fold change relative to WT | Peak area<br>(mAU*s) | Fold change relative to WT |
| Wild-type (WT) | <sup>a</sup> 3190.3  | 1                          | <sup>c</sup> 870.9   | 1                          |
| pYP3 /WT       | <sup>b</sup> 4120.9  | 1.29                       | <sup>d</sup> 234.6   | 1                          |
|                |                      |                            | <sup>e</sup> 412.2   | 0.47                       |
|                |                      |                            | <sup>f</sup> 97.2    | 0.41                       |

a,b,c,d,e,f represent the peak area of natamycin and yellow pigment from the WT strain and *wbla<sub>cht</sub>*-overexpression strain, respectively. They are determined by HPLC analysis.

The front peak of yellow pigment as shown in Fig.S3<sup>c,e</sup>.

The later peak of yellow pigment as shown in Fig.S3<sup>d,f</sup>.
